# Supplementary material
Source: PubMed Central journal article supplement (PMC3686472)
Supplement: NIHMS374545-supplement-Supp_Figure_S1.pdf [file NIHMS374545-supplement-Supp_Figure_S1.pdf]

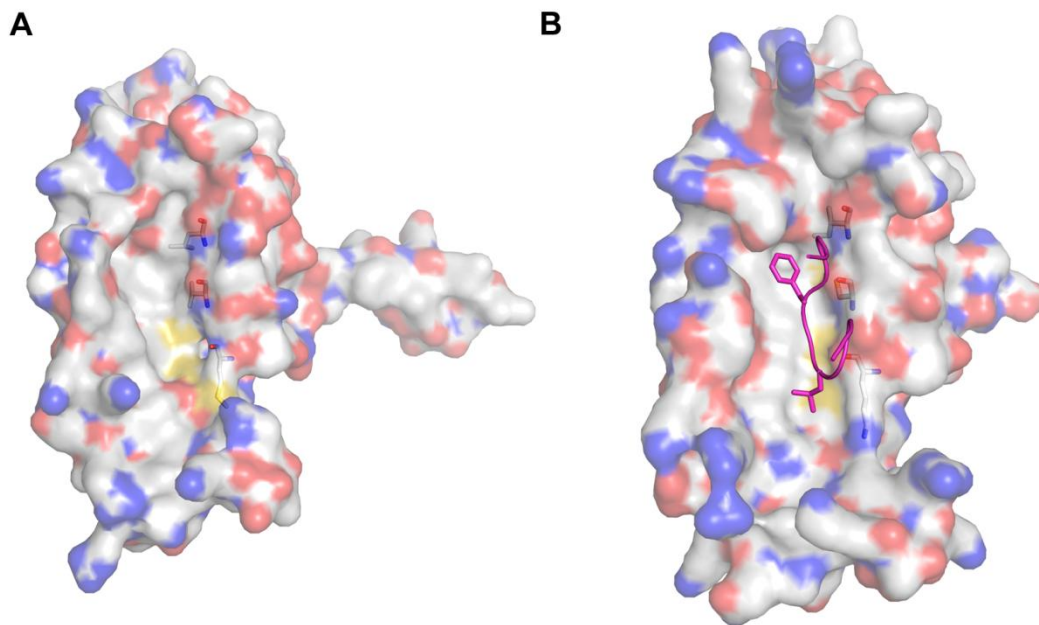

**Supplementary Figure S1:**

Surface representations of CgNup116 (A) and ScNup116 in the ScNup82:ScNup159 complex (B) are displayed in the same orientation. Residues Met953, Val955, and Leu957 of CgNup116, and Lys1029, Cys1032, and Ile1033 of ScNup116 are shown in stick representations. The “FGL” loop of Nup82 bound to ScNup116 is shown in panel B for reference. Surfaces are color coded by atoms with Carbon, Nitrogen, Oxygen, and Sulfur atoms shown in white, blue, red, and yellow, respectively.
